# Supplementary material for: Sulfated motifs in heparan sulfate inhibit Streptococcus pneumoniae adhesion onto fibronectin and attenuate corneal infection
Source: PubMed Central journal article supplement (PMC11218895; doi:10.1002/pgr2.9), 2023-08-09

PLA

TIGR4 binding to LM: Control

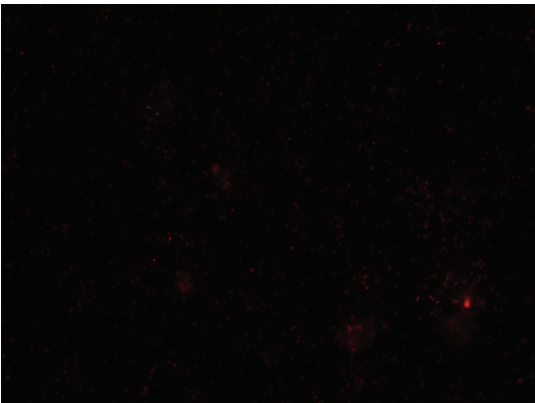

TIGR4 binding to LM: +HS

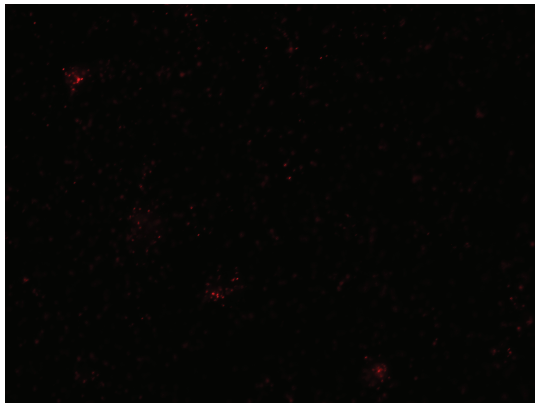

Supplement: NIHMS1950838-supplement-Fig_S4.pdf [file NIHMS1950838-supplement-Fig_S4.pdf]
